# Supplementary material
Source: publisher figshare collection journal article supplement (https://karger.figshare.com/ndownloader/files/14876879)

Supplemental Figure 1. Discontinuation criteria.


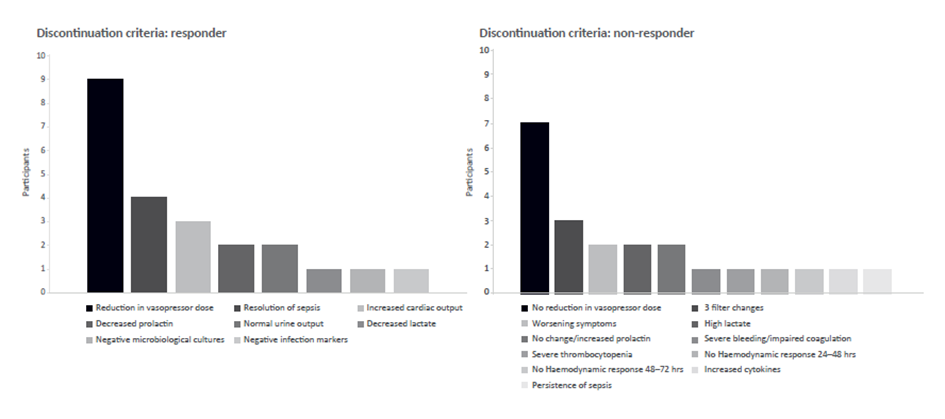


Supplemental Figure 2. Definition of successful treatment and early improvement


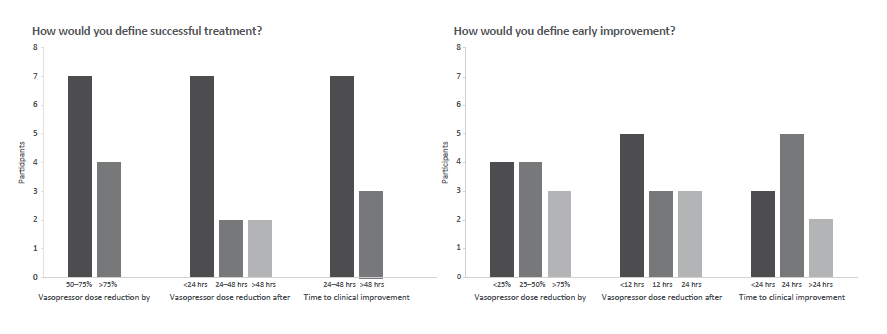

Supplement: Supplementary file 1 [file 14876879]
